# Supplementary material for: A Systematic Study of Estimating Potato N Concentrations Using UAV-Based Hyper- and Multi-Spectral Imagery
Source: MDPI journal article supplement (doi:10.3390/agronomy12102533), 2022-10-17
Supplement: s1 [file s1]

## Supplementary

Table S1. Pearson correlations and Variable Importance in Projection scores of the multispectral bands

| Camera                | Band Name | Band Center | Band Width | Pearson Correlation          |                                | VIP                          |                                |
|-----------------------|-----------|-------------|------------|------------------------------|--------------------------------|------------------------------|--------------------------------|
|                       |           |             |            | Total Nitrogen Concentration | Nitrate-Nitrogen Concentration | Total Nitrogen Concentration | Nitrate-Nitrogen Concentration |
| <b>Phantom 4</b>      | Blue      | 450         | 16         | <b>-0.59</b>                 | <b>-0.59</b>                   | 0.47                         | 0.44                           |
|                       | Green     | 560         | 16         | -0.49                        | <b>-0.67</b>                   | 0.84                         | <b>1.06</b>                    |
|                       | Red       | 650         | 16         | <b>-0.55</b>                 | <b>-0.56</b>                   | <b>1.19</b>                  | <b>1.23</b>                    |
|                       | Red Edge  | 730         | 16         | -0.18                        | -0.36                          | 0.50                         | 0.84                           |
|                       | NIR       | 840         | 26         | -0.08                        | -0.24                          | <b>1.55</b>                  | <b>1.21</b>                    |
| <b>Parrot Sequoia</b> | Green     | 550         | 40         | -0.48                        | <b>-0.67</b>                   | 0.71                         | <b>1.07</b>                    |
|                       | Red       | 660         | 40         | -0.54                        | -0.54                          | 0.95                         | <b>1.22</b>                    |
|                       | Red Edge  | 735         | 10         | -0.12                        | -0.30                          | 0.34                         | 0.32                           |
|                       | NIR       | 790         | 40         | -0.06                        | -0.22                          | <b>1.57</b>                  | <b>1.12</b>                    |
| <b>Micasense</b>      | Blue      | 475         | 32         | <b>-0.59</b>                 | <b>-0.57</b>                   | 0.76                         | 0.62                           |
|                       | Green     | 560         | 27         | -0.50                        | <b>-0.68</b>                   | <b>1.19</b>                  | <b>1.40</b>                    |
|                       | Red       | 668         | 14         | -0.52                        | -0.51                          | 0.85                         | 0.87                           |
|                       | Red Edge  | 717         | 12         | -0.35                        | -0.53                          | 0.78                         | 0.98                           |
|                       | NIR       | 842         | 57         | -0.08                        | -0.23                          | <b>1.29</b>                  | 0.97                           |

Table S2. Pearson correlations and Variable Importance in Projection scores of the hyperspectral bands

| Hyperspectral wavelength | Pearson Correlation          |                                | VIP                          |                                |
|--------------------------|------------------------------|--------------------------------|------------------------------|--------------------------------|
|                          | Total Nitrogen Concentration | Nitrate-Nitrogen Concentration | Total Nitrogen Concentration | Nitrate-Nitrogen Concentration |
| 399.3                    | -0.53                        | <b>-0.57</b>                   | <b>1.11</b>                  | <b>1.22</b>                    |
| 401.5                    | -0.50                        | -0.50                          | <b>1.33</b>                  | <b>1.23</b>                    |
| 403.7                    | <b>-0.58</b>                 | <b>-0.63</b>                   | 0.74                         | 0.63                           |
| 405.9                    | <b>-0.58</b>                 | <b>-0.61</b>                   | 0.69                         | 0.65                           |
| 408.2                    | -0.21                        | -0.20                          | <b>1.78</b>                  | <b>1.88</b>                    |
| 410.4                    | <b>-0.63</b>                 | <b>-0.62</b>                   | 0.65                         | 0.52                           |
| 412.6                    | -0.52                        | <b>-0.55</b>                   | 0.95                         | 0.95                           |
| 414.8                    | <b>-0.58</b>                 | <b>-0.65</b>                   | 0.60                         | 0.48                           |
| 417.0                    | <b>-0.56</b>                 | <b>-0.62</b>                   | 0.72                         | 0.68                           |
| 419.2                    | -0.51                        | <b>-0.55</b>                   | 0.61                         | 0.49                           |
| 421.4                    | <b>-0.57</b>                 | <b>-0.63</b>                   | 0.55                         | 0.47                           |
| 423.6                    | -0.54                        | <b>-0.59</b>                   | 0.59                         | 0.47                           |
| 425.8                    | <b>-0.58</b>                 | <b>-0.61</b>                   | 0.59                         | 0.43                           |
| 428.1                    | <b>-0.56</b>                 | <b>-0.58</b>                   | 0.60                         | 0.52                           |
| 430.3                    | <b>-0.61</b>                 | <b>-0.61</b>                   | 0.67                         | 0.49                           |
| 432.5                    | <b>-0.60</b>                 | <b>-0.61</b>                   | 0.52                         | 0.40                           |
| 434.7                    | <b>-0.63</b>                 | <b>-0.63</b>                   | 0.60                         | 0.45                           |
| 436.9                    | <b>-0.55</b>                 | <b>-0.60</b>                   | 0.50                         | 0.45                           |
| 439.1                    | <b>-0.59</b>                 | <b>-0.58</b>                   | 0.59                         | 0.49                           |
| 441.3                    | <b>-0.56</b>                 | <b>-0.58</b>                   | 0.45                         | 0.41                           |
| 443.5                    | -0.52                        | <b>-0.56</b>                   | 0.69                         | 0.64                           |
| 445.8                    | -0.52                        | <b>-0.58</b>                   | 0.51                         | 0.51                           |
| 448.0                    | <b>-0.61</b>                 | <b>-0.57</b>                   | 0.70                         | 0.55                           |

|       |       |       |      |      |
|-------|-------|-------|------|------|
| 450.2 | -0.58 | -0.58 | 0.49 | 0.46 |
| 452.4 | -0.62 | -0.56 | 0.73 | 0.55 |
| 454.6 | -0.59 | -0.58 | 0.58 | 0.49 |
| 456.8 | -0.58 | -0.57 | 0.76 | 0.60 |
| 459.0 | -0.58 | -0.55 | 0.47 | 0.45 |
| 461.2 | -0.62 | -0.57 | 0.72 | 0.55 |
| 463.4 | -0.61 | -0.56 | 0.55 | 0.45 |
| 465.7 | -0.59 | -0.57 | 0.60 | 0.52 |
| 467.9 | -0.60 | -0.57 | 0.50 | 0.44 |
| 470.1 | -0.60 | -0.56 | 0.67 | 0.56 |
| 472.3 | -0.56 | -0.54 | 0.47 | 0.46 |
| 474.5 | -0.59 | -0.56 | 0.53 | 0.50 |
| 476.7 | -0.57 | -0.58 | 0.71 | 0.65 |
| 478.9 | -0.57 | -0.56 | 0.47 | 0.49 |
| 481.1 | -0.57 | -0.57 | 0.47 | 0.49 |
| 483.3 | -0.56 | -0.56 | 0.47 | 0.50 |
| 485.6 | -0.56 | -0.57 | 0.51 | 0.55 |
| 487.8 | -0.57 | -0.57 | 0.52 | 0.54 |
| 490.0 | -0.59 | -0.58 | 0.63 | 0.62 |
| 492.2 | -0.56 | -0.57 | 0.53 | 0.59 |
| 494.4 | -0.56 | -0.57 | 0.48 | 0.53 |
| 496.6 | -0.57 | -0.58 | 0.56 | 0.59 |
| 498.8 | -0.56 | -0.57 | 0.51 | 0.58 |
| 501.0 | -0.57 | -0.58 | 0.51 | 0.58 |
| 503.3 | -0.55 | -0.57 | 0.51 | 0.53 |
| 505.5 | -0.54 | -0.58 | 0.57 | 0.64 |
| 507.7 | -0.55 | -0.60 | 0.55 | 0.59 |
| 509.9 | -0.53 | -0.59 | 0.59 | 0.68 |
| 512.1 | -0.55 | -0.61 | 0.55 | 0.63 |
| 514.3 | -0.55 | -0.63 | 0.52 | 0.58 |
| 516.5 | -0.55 | -0.64 | 0.52 | 0.61 |
| 518.7 | -0.56 | -0.67 | 0.50 | 0.62 |
| 520.9 | -0.54 | -0.68 | 0.54 | 0.69 |
| 523.2 | -0.54 | -0.68 | 0.53 | 0.72 |
| 525.4 | -0.51 | -0.66 | 0.55 | 0.73 |
| 527.6 | -0.51 | -0.67 | 0.54 | 0.76 |
| 529.8 | -0.52 | -0.68 | 0.60 | 0.78 |
| 532.0 | -0.50 | -0.68 | 0.61 | 0.82 |
| 534.2 | -0.49 | -0.67 | 0.63 | 0.82 |
| 536.4 | -0.45 | -0.63 | 0.60 | 0.76 |
| 538.6 | -0.47 | -0.65 | 0.65 | 0.83 |
| 540.9 | -0.45 | -0.63 | 0.64 | 0.84 |
| 543.1 | -0.48 | -0.67 | 0.73 | 0.93 |
| 545.3 | -0.45 | -0.63 | 0.64 | 0.82 |
| 547.5 | -0.49 | -0.68 | 0.77 | 1.00 |
| 549.7 | -0.48 | -0.66 | 0.72 | 0.90 |
| 551.9 | -0.47 | -0.66 | 0.68 | 0.90 |
| 554.1 | -0.48 | -0.67 | 0.74 | 0.93 |
| 556.3 | -0.49 | -0.67 | 0.75 | 1.00 |
| 558.5 | -0.48 | -0.67 | 0.76 | 0.95 |
| 560.8 | -0.49 | -0.67 | 0.74 | 0.94 |
| 563.0 | -0.48 | -0.66 | 0.69 | 0.90 |
| 565.2 | -0.52 | -0.69 | 0.74 | 0.97 |

|       |              |              |             |             |
|-------|--------------|--------------|-------------|-------------|
| 567.4 | -0.51        | <b>-0.68</b> | 0.72        | 0.92        |
| 569.6 | -0.53        | <b>-0.69</b> | 0.76        | 0.97        |
| 571.8 | -0.53        | <b>-0.69</b> | 0.74        | 0.96        |
| 574.0 | <b>-0.57</b> | <b>-0.72</b> | 0.84        | <b>1.05</b> |
| 576.2 | <b>-0.56</b> | <b>-0.70</b> | 0.80        | <b>1.03</b> |
| 578.4 | <b>-0.56</b> | <b>-0.70</b> | 0.74        | 0.94        |
| 580.7 | <b>-0.57</b> | <b>-0.69</b> | 0.77        | 0.94        |
| 582.9 | <b>-0.59</b> | <b>-0.70</b> | 0.79        | 0.96        |
| 585.1 | <b>-0.57</b> | <b>-0.69</b> | 0.81        | 0.96        |
| 587.3 | <b>-0.59</b> | <b>-0.69</b> | 0.78        | <b>1.01</b> |
| 589.5 | <b>-0.58</b> | <b>-0.69</b> | 0.80        | 0.99        |
| 591.7 | <b>-0.59</b> | <b>-0.69</b> | 0.79        | <b>1.02</b> |
| 593.9 | <b>-0.58</b> | <b>-0.68</b> | 0.82        | <b>1.01</b> |
| 596.1 | <b>-0.60</b> | <b>-0.69</b> | 0.81        | <b>1.03</b> |
| 598.4 | <b>-0.58</b> | <b>-0.68</b> | 0.84        | <b>1.04</b> |
| 600.6 | <b>-0.60</b> | <b>-0.68</b> | 0.81        | <b>1.03</b> |
| 602.8 | <b>-0.59</b> | <b>-0.68</b> | 0.86        | <b>1.08</b> |
| 605.0 | <b>-0.59</b> | <b>-0.68</b> | 0.83        | <b>1.06</b> |
| 607.2 | <b>-0.59</b> | <b>-0.66</b> | 0.87        | <b>1.07</b> |
| 609.4 | <b>-0.60</b> | <b>-0.66</b> | 0.85        | <b>1.07</b> |
| 611.6 | <b>-0.58</b> | <b>-0.66</b> | 0.93        | <b>1.10</b> |
| 613.8 | <b>-0.60</b> | <b>-0.65</b> | 0.90        | <b>1.08</b> |
| 616.0 | <b>-0.59</b> | <b>-0.65</b> | 0.89        | <b>1.06</b> |
| 618.3 | <b>-0.58</b> | <b>-0.63</b> | 0.91        | <b>1.08</b> |
| 620.5 | <b>-0.58</b> | <b>-0.62</b> | 0.94        | <b>1.05</b> |
| 622.7 | <b>-0.58</b> | <b>-0.61</b> | 0.93        | <b>1.06</b> |
| 624.9 | <b>-0.58</b> | <b>-0.62</b> | 0.92        | <b>1.06</b> |
| 627.1 | <b>-0.59</b> | <b>-0.62</b> | 0.91        | <b>1.06</b> |
| 629.3 | <b>-0.57</b> | <b>-0.61</b> | 0.96        | <b>1.08</b> |
| 631.5 | <b>-0.58</b> | <b>-0.61</b> | 0.94        | <b>1.08</b> |
| 633.7 | <b>-0.58</b> | <b>-0.62</b> | 0.94        | <b>1.06</b> |
| 635.9 | <b>-0.58</b> | <b>-0.62</b> | 0.95        | <b>1.09</b> |
| 638.2 | <b>-0.58</b> | <b>-0.61</b> | 0.96        | <b>1.08</b> |
| 640.4 | <b>-0.57</b> | <b>-0.59</b> | <b>1.01</b> | <b>1.10</b> |
| 642.6 | <b>-0.56</b> | <b>-0.58</b> | <b>1.01</b> | <b>1.07</b> |
| 644.8 | <b>-0.56</b> | <b>-0.58</b> | <b>1.04</b> | <b>1.08</b> |
| 647.0 | <b>-0.56</b> | <b>-0.58</b> | <b>1.04</b> | <b>1.07</b> |
| 649.2 | <b>-0.55</b> | <b>-0.57</b> | <b>1.06</b> | <b>1.05</b> |
| 651.4 | <b>-0.55</b> | <b>-0.56</b> | <b>1.07</b> | <b>1.05</b> |
| 653.6 | <b>-0.55</b> | -0.54        | <b>1.07</b> | <b>1.07</b> |
| 655.9 | -0.54        | <b>-0.55</b> | <b>1.08</b> | <b>1.05</b> |
| 658.1 | -0.54        | -0.53        | <b>1.09</b> | <b>1.08</b> |
| 660.3 | -0.53        | -0.53        | <b>1.11</b> | <b>1.09</b> |
| 662.5 | -0.53        | -0.52        | <b>1.13</b> | <b>1.14</b> |
| 664.7 | -0.53        | -0.52        | <b>1.16</b> | <b>1.15</b> |
| 666.9 | -0.52        | -0.50        | <b>1.20</b> | <b>1.25</b> |
| 669.1 | -0.52        | -0.52        | <b>1.18</b> | <b>1.21</b> |
| 671.3 | -0.51        | -0.49        | <b>1.23</b> | <b>1.29</b> |
| 673.5 | -0.51        | -0.50        | <b>1.25</b> | <b>1.29</b> |
| 675.8 | -0.51        | -0.49        | <b>1.25</b> | <b>1.31</b> |
| 678.0 | -0.52        | -0.51        | <b>1.21</b> | <b>1.28</b> |
| 680.2 | -0.50        | -0.49        | <b>1.29</b> | <b>1.37</b> |
| 682.4 | -0.51        | -0.50        | <b>1.30</b> | <b>1.34</b> |

|       |              |              |             |             |
|-------|--------------|--------------|-------------|-------------|
| 684.6 | -0.52        | -0.51        | <b>1.25</b> | <b>1.27</b> |
| 686.8 | -0.53        | -0.52        | <b>1.23</b> | <b>1.20</b> |
| 689.0 | -0.54        | <b>-0.55</b> | <b>1.18</b> | <b>1.15</b> |
| 691.2 | <b>-0.55</b> | <b>-0.57</b> | <b>1.19</b> | <b>1.16</b> |
| 693.4 | <b>-0.58</b> | <b>-0.61</b> | <b>1.10</b> | <b>1.20</b> |
| 695.7 | <b>-0.59</b> | <b>-0.65</b> | <b>1.13</b> | <b>1.34</b> |
| 697.9 | <b>-0.59</b> | <b>-0.67</b> | <b>1.06</b> | <b>1.32</b> |
| 700.1 | <b>-0.59</b> | <b>-0.69</b> | <b>1.14</b> | <b>1.41</b> |
| 702.3 | <b>-0.57</b> | <b>-0.69</b> | <b>1.12</b> | <b>1.43</b> |
| 704.5 | <b>-0.55</b> | <b>-0.69</b> | <b>1.20</b> | <b>1.52</b> |
| 706.7 | -0.51        | <b>-0.66</b> | <b>1.15</b> | <b>1.50</b> |
| 708.9 | -0.48        | <b>-0.65</b> | <b>1.21</b> | <b>1.56</b> |
| 711.1 | -0.45        | <b>-0.62</b> | <b>1.23</b> | <b>1.58</b> |
| 713.4 | -0.41        | <b>-0.59</b> | <b>1.16</b> | <b>1.54</b> |
| 715.6 | -0.37        | <b>-0.56</b> | <b>1.17</b> | <b>1.52</b> |
| 717.8 | -0.33        | -0.52        | <b>1.12</b> | <b>1.48</b> |
| 720.0 | -0.30        | -0.49        | <b>1.09</b> | <b>1.42</b> |
| 722.2 | -0.27        | -0.46        | <b>1.05</b> | <b>1.34</b> |
| 724.4 | -0.24        | -0.43        | 0.98        | <b>1.27</b> |
| 726.6 | -0.22        | -0.40        | 0.93        | <b>1.20</b> |
| 728.8 | -0.19        | -0.37        | 0.85        | <b>1.10</b> |
| 731.0 | -0.17        | -0.35        | 0.84        | <b>1.01</b> |
| 733.3 | -0.14        | -0.32        | 0.79        | 0.95        |
| 735.5 | -0.13        | -0.31        | 0.81        | 0.91        |
| 737.7 | -0.11        | -0.29        | 0.80        | 0.88        |
| 739.9 | -0.10        | -0.27        | 0.86        | 0.83        |
| 742.1 | -0.09        | -0.26        | 0.86        | 0.86        |
| 744.3 | -0.08        | -0.25        | 0.91        | 0.85        |
| 746.5 | -0.07        | -0.24        | 0.94        | 0.88        |
| 748.7 | -0.06        | -0.23        | 0.98        | 0.87        |
| 751.0 | -0.05        | -0.22        | <b>1.08</b> | 0.94        |
| 753.2 | -0.05        | -0.22        | <b>1.14</b> | 0.98        |
| 755.4 | -0.04        | -0.21        | <b>1.27</b> | <b>1.08</b> |
| 757.6 | -0.05        | -0.21        | <b>1.19</b> | 0.99        |
| 759.8 | -0.05        | -0.21        | <b>1.21</b> | 0.99        |
| 762.0 | -0.06        | -0.21        | <b>1.35</b> | <b>1.15</b> |
| 764.2 | -0.06        | -0.21        | <b>1.36</b> | <b>1.28</b> |
| 766.4 | -0.06        | -0.22        | <b>1.17</b> | <b>1.06</b> |
| 768.6 | -0.05        | -0.21        | <b>1.30</b> | 0.99        |
| 770.9 | -0.05        | -0.21        | <b>1.24</b> | <b>1.02</b> |
| 773.1 | -0.05        | -0.21        | <b>1.24</b> | <b>1.00</b> |
| 775.3 | -0.05        | -0.21        | <b>1.25</b> | <b>1.01</b> |
| 777.5 | -0.05        | -0.20        | <b>1.23</b> | 0.99        |
| 779.7 | -0.05        | -0.21        | <b>1.24</b> | <b>1.00</b> |
| 781.9 | -0.05        | -0.21        | <b>1.23</b> | <b>1.02</b> |
| 784.1 | -0.05        | -0.21        | <b>1.16</b> | 0.99        |
| 786.3 | -0.05        | -0.21        | <b>1.11</b> | 0.91        |
| 788.5 | -0.06        | -0.21        | <b>1.12</b> | 0.90        |
| 790.8 | -0.06        | -0.21        | <b>1.08</b> | 0.91        |
| 793.0 | -0.06        | -0.22        | <b>1.05</b> | 0.89        |
| 795.2 | -0.06        | -0.22        | <b>1.05</b> | 0.85        |
| 797.4 | -0.07        | -0.22        | <b>1.01</b> | 0.84        |
| 799.6 | -0.06        | -0.22        | <b>1.06</b> | 0.85        |

|       |       |       |             |             |
|-------|-------|-------|-------------|-------------|
| 801.8 | -0.07 | -0.23 | <b>1.04</b> | 0.83        |
| 804.0 | -0.06 | -0.22 | <b>1.02</b> | 0.83        |
| 806.2 | -0.07 | -0.22 | <b>1.03</b> | 0.83        |
| 808.5 | -0.07 | -0.22 | <b>1.06</b> | 0.84        |
| 810.7 | -0.07 | -0.23 | <b>1.04</b> | 0.81        |
| 812.9 | -0.07 | -0.22 | <b>1.29</b> | <b>1.09</b> |
| 815.1 | -0.07 | -0.23 | 0.99        | 0.77        |
| 817.3 | -0.08 | -0.23 | <b>1.03</b> | 0.83        |
| 819.5 | -0.09 | -0.24 | 0.97        | 0.91        |
| 821.7 | -0.07 | -0.23 | <b>1.10</b> | 0.85        |
| 823.9 | -0.08 | -0.24 | <b>1.03</b> | 0.87        |
| 826.1 | -0.08 | -0.24 | <b>1.04</b> | 0.75        |
| 828.4 | -0.09 | -0.24 | 0.91        | 0.73        |
| 830.6 | -0.08 | -0.24 | 0.95        | 0.84        |
| 832.8 | -0.09 | -0.24 | 0.92        | 0.77        |
| 835.0 | -0.08 | -0.24 | 0.92        | 0.79        |
| 837.2 | -0.09 | -0.24 | 0.89        | 0.76        |
| 839.4 | -0.08 | -0.23 | 0.99        | 0.77        |
| 841.6 | -0.09 | -0.24 | 0.88        | 0.74        |
| 843.8 | -0.08 | -0.23 | <b>1.08</b> | 0.89        |
| 846.0 | -0.09 | -0.24 | 0.87        | 0.70        |
| 848.3 | -0.08 | -0.23 | <b>1.03</b> | 0.83        |
| 850.5 | -0.08 | -0.24 | 0.98        | 0.73        |
| 852.7 | -0.08 | -0.23 | <b>1.02</b> | 0.90        |
| 854.9 | -0.09 | -0.24 | <b>1.00</b> | 0.92        |
| 857.1 | -0.08 | -0.23 | 0.97        | 0.76        |
| 859.3 | -0.09 | -0.24 | 0.89        | 0.76        |
| 861.5 | -0.08 | -0.23 | <b>1.06</b> | 0.92        |
| 863.7 | -0.09 | -0.24 | 0.90        | 0.79        |
| 866.0 | -0.08 | -0.23 | 0.93        | 0.80        |
| 868.2 | -0.09 | -0.24 | 0.94        | 0.85        |
| 870.4 | -0.08 | -0.23 | <b>1.05</b> | 0.98        |
| 872.6 | -0.10 | -0.24 | <b>1.04</b> | 0.93        |
| 874.8 | -0.09 | -0.24 | 0.96        | 0.85        |
| 877.0 | -0.10 | -0.25 | 0.95        | 0.85        |
| 879.2 | -0.09 | -0.24 | 0.97        | 0.78        |
| 881.4 | -0.10 | -0.24 | 0.87        | 0.77        |
| 883.6 | -0.09 | -0.23 | <b>1.06</b> | 0.97        |
| 885.9 | -0.10 | -0.25 | <b>1.06</b> | 0.81        |
| 888.1 | -0.09 | -0.24 | 0.88        | 0.71        |
| 890.3 | -0.11 | -0.25 | 0.90        | 0.83        |
| 892.5 | -0.09 | -0.24 | 0.93        | 0.73        |
| 894.7 | -0.10 | -0.26 | 0.93        | 0.85        |
| 896.9 | -0.11 | -0.25 | 0.89        | 0.85        |
| 899.1 | -0.11 | -0.25 | 0.84        | 0.77        |
| 901.3 | -0.12 | -0.26 | 0.99        | <b>1.01</b> |
| 903.5 | -0.12 | -0.27 | 0.87        | 0.79        |
| 905.8 | -0.11 | -0.26 | 0.94        | 0.82        |
| 908.0 | -0.11 | -0.26 | 0.93        | 0.78        |
| 910.2 | -0.12 | -0.26 | <b>1.01</b> | 0.98        |
| 912.4 | -0.12 | -0.27 | 0.93        | 0.84        |
| 914.6 | -0.13 | -0.27 | <b>1.07</b> | <b>1.10</b> |
| 916.8 | -0.12 | -0.27 | 0.85        | 0.74        |

|        |       |       |             |             |
|--------|-------|-------|-------------|-------------|
| 919.0  | -0.12 | -0.26 | <b>1.11</b> | <b>1.09</b> |
| 921.2  | -0.12 | -0.26 | <b>1.09</b> | <b>1.03</b> |
| 923.5  | -0.13 | -0.28 | <b>1.16</b> | <b>1.22</b> |
| 925.7  | -0.12 | -0.26 | <b>1.63</b> | <b>1.20</b> |
| 927.9  | -0.13 | -0.28 | <b>1.14</b> | <b>1.27</b> |
| 930.1  | -0.14 | -0.28 | <b>1.24</b> | <b>1.28</b> |
| 932.3  | -0.13 | -0.27 | <b>1.12</b> | <b>1.11</b> |
| 934.5  | -0.13 | -0.27 | <b>2.17</b> | <b>2.34</b> |
| 936.7  | -0.13 | -0.25 | <b>2.00</b> | <b>1.92</b> |
| 938.9  | -0.15 | -0.29 | <b>2.13</b> | <b>1.70</b> |
| 941.1  | -0.15 | -0.29 | <b>1.45</b> | <b>1.39</b> |
| 943.4  | -0.14 | -0.28 | <b>1.45</b> | <b>1.13</b> |
| 945.6  | -0.15 | -0.28 | <b>1.31</b> | <b>1.34</b> |
| 947.8  | -0.14 | -0.28 | <b>1.14</b> | <b>1.07</b> |
| 950.0  | -0.13 | -0.26 | <b>1.67</b> | <b>1.71</b> |
| 952.2  | -0.16 | -0.29 | <b>1.07</b> | 0.96        |
| 954.4  | -0.15 | -0.29 | <b>1.03</b> | <b>1.03</b> |
| 956.6  | -0.15 | -0.30 | <b>1.10</b> | <b>1.18</b> |
| 958.8  | -0.16 | -0.30 | <b>1.09</b> | 0.98        |
| 961.0  | -0.15 | -0.27 | <b>1.48</b> | <b>1.56</b> |
| 963.3  | -0.16 | -0.29 | <b>1.48</b> | <b>1.35</b> |
| 965.5  | -0.17 | -0.31 | <b>1.24</b> | <b>1.07</b> |
| 967.7  | -0.18 | -0.32 | <b>1.73</b> | <b>1.49</b> |
| 969.9  | -0.16 | -0.29 | <b>1.07</b> | 0.92        |
| 972.1  | -0.15 | -0.30 | <b>1.56</b> | <b>1.96</b> |
| 974.3  | -0.16 | -0.29 | <b>1.40</b> | <b>1.02</b> |
| 976.5  | -0.16 | -0.29 | <b>1.74</b> | <b>1.13</b> |
| 978.7  | -0.16 | -0.28 | <b>1.57</b> | <b>1.17</b> |
| 981.0  | -0.16 | -0.29 | <b>1.03</b> | 0.81        |
| 983.2  | -0.16 | -0.29 | <b>1.10</b> | 0.96        |
| 985.4  | -0.16 | -0.29 | <b>1.16</b> | <b>1.11</b> |
| 987.6  | -0.15 | -0.29 | <b>1.03</b> | <b>1.06</b> |
| 989.8  | -0.15 | -0.27 | <b>1.41</b> | <b>1.14</b> |
| 992.0  | -0.15 | -0.27 | <b>1.08</b> | <b>1.03</b> |
| 994.2  | -0.14 | -0.27 | <b>1.04</b> | <b>1.23</b> |
| 996.4  | -0.14 | -0.29 | <b>1.49</b> | <b>1.80</b> |
| 998.6  | -0.15 | -0.26 | <b>1.31</b> | <b>1.47</b> |
| 1000.9 | -0.17 | -0.30 | <b>1.14</b> | <b>1.10</b> |
| 1003.1 | -0.15 | -0.28 | <b>1.17</b> | <b>1.16</b> |

---
